# Supplementary material
Source: publisher site journal article supplement (https://www.dovepress.com/article/115025)
Supplement: Supplementary file 1 [file get_supplementary_file.php]

## Supplementary materials

**Table S1** Asthma medications

| Category                             | Prescriptions                                                                                            |
|--------------------------------------|----------------------------------------------------------------------------------------------------------|
| Antiasthmatic combinations           | Dyphylline-guaifenesin, guaifenesin-theophylline, or potassium iodide-theophylline                       |
| Antibody inhibitor                   | Omalizumab                                                                                               |
| Inhaled steroid combinations         | Budesonide-formoterol or fluticasone-salmeterol                                                          |
| Inhaled corticosteroids              | Beclomethasone, budesonide, ciclesonide, flunisolide, fluticasone CFC free, mometasone, or triamcinolone |
| Leukotriene modifiers                | Montelukast, zafirlukast, or zileuton                                                                    |
| Long-acting inhaled beta-2 agonists  | Arformoterol, formoterol, or salmeterol                                                                  |
| Mast cell stabilizers                | Cromolyn or nedocromil                                                                                   |
| Methylxanthines                      | Aminophylline, dyphylline, oxtriphylline, or theophylline                                                |
| Short-acting inhaled beta-2 agonists | Albuterol, levalbuterol, metaproterenol, or pirbuterol                                                   |

**Abbreviation:** CFC, chlorofluorocarbon.

**Table S2** ICD-9-CM diagnosis and CPT codes for glucocorticoid-related side effects

| ICD-9-CM code              | Description                                                                     |
|----------------------------|---------------------------------------------------------------------------------|
| Osteoporosis               |                                                                                 |
| 733.0x                     | Osteoporosis                                                                    |
| Fractures                  |                                                                                 |
| Nonvertebral               |                                                                                 |
| Hip                        |                                                                                 |
| 733.14                     | Pathologic fracture of neck of femur                                            |
| 820.xx                     | Fracture of the neck of femur                                                   |
| 27220–27248<br>(CPT codes) | Hip joint fracture                                                              |
| Forearm                    |                                                                                 |
| 733.12                     | Pathologic fracture of radius and ulna                                          |
| 813.xx                     | Fracture of radius and ulna, open and closed                                    |
| 25500–25620<br>(CPT codes) | Forearm fracture                                                                |
| All other sites            |                                                                                 |
| Arm                        |                                                                                 |
| 733.11                     | Pathologic fracture of humerus                                                  |
| 812.xx                     | Humerus, open and closed                                                        |
| 818.x                      | Ill-defined fracture of upper limb                                              |
| 819.x                      | Multiple fracture involving upper limbs, and upper limb with rib(s) and sternum |
| 24500–24587<br>(CPT codes) | Humerus fracture                                                                |

24620–24635, Elbow fracture  
 24650–  
 24685 (CPT  
 codes)

#### Lower leg

733.15 Pathologic fracture of other unspecified part of femur  
 733.16 Pathologic fracture of tibia and fibula  
 733.93 Stress fracture of tibia or fibula  
 823.xx Tibia and fibula, open and closed fractures.  
 827.x Other, multiple, and ill-defined fracture of lower limb,  
 open and closed  
 828.x Multiple fractures involving both lower limbs, lower with  
 upper limb, and lower limbs with rib and sternum, open  
 and closed  
 27750–27792 Tibia, fibula fractures  
 (CPT codes)

#### Pelvis

808.x Pelvis fracture  
 27193–27218 Pelvis fracture  
 (CPT codes)

#### Ribs

807.0x Rib fracture, closed  
 807.1x Rib fracture, open  
 21800–21810 Rib fracture, open and closed treatment, with and  
 (CPT codes) without internal fixation

#### Ankle

824.x Ankle, open and closed

27808–27832 Ankle joint fracture  
(CPT codes)

#### Foot

733.94 Stress fracture of the metatarsal  
825.xx ≥1 tarsal and metatarsal bones  
826.x ≥1 phalanges of the foot

28400–28531 Foot and toe fracture  
(CPT codes)

#### Vertebral

733.13 Pathologic fracture of vertebrae  
805.xx Vertebral column without mention of spinal cord injury  
806.xx Vertebral column with spinal cord injury  
22305–22328 Vertebral fracture  
(CPT codes)

#### Hip replacement

27125 (CPT code) Hemiarthroplasty, hip, partial  
27130 (CPT code) Arthroplasty, acetabular and proximal femoral prosthetic replacement  
27236 (CPT code) Open treatment of femoral fracture, proximal end, neck; internal fixation or prosthetic replacement

#### Aseptic necrosis of bone

733.4x Aseptic necrosis of bone

#### Cataract

366.xx Cataracts

|                  |                                                                                                                  |
|------------------|------------------------------------------------------------------------------------------------------------------|
| E932.0           | Adrenal cortical steroids; drugs, medicinal and biological substances causing adverse effects in therapeutic use |
| 66982 (CPT code) | Extracapsular cataract removal with insertion of intraocular lens                                                |
| 66983 (CPT code) | Intracapsular cataract extraction with insertion of intraocular lens                                             |
| 66984 (CPT code) | Extracapsular cataract removal with insertion of intraocular lens                                                |
| Ulcer disease    |                                                                                                                  |
| 531.0x           | Gastric ulcer, acute with hemorrhage, with and without obstruction                                               |
| 531.1x           | Gastric ulcer, acute with perforation, with and without obstruction                                              |
| 531.2x           | Gastric ulcer, acute with hemorrhage and perforation, with and without obstruction                               |
| 531.4x           | Gastric ulcer, chronic or unspecified with hemorrhage, with and without obstruction                              |
| 531.5x           | Gastric ulcer, chronic or unspecified with perforation, with and without obstruction                             |
| 531.6x           | Gastric ulcer, chronic or unspecified with hemorrhage and perforation, with and without obstruction              |
| 532.0x           | Duodenal ulcer, acute with hemorrhage, with and without obstruction                                              |
| 532.1x           | Duodenal ulcer, acute with perforation, with and without obstruction                                             |
| 532.2x           | Duodenal ulcer, acute with hemorrhage and perforation, with and without obstruction                              |

|        |                                                                                                      |
|--------|------------------------------------------------------------------------------------------------------|
| 532.4x | Duodenal ulcer, chronic or unspecified with hemorrhage, with and without obstruction                 |
| 532.5x | Duodenal ulcer, chronic or unspecified with perforation, with and without obstruction                |
| 532.6x | Duodenal ulcer, chronic or unspecified with hemorrhage and perforation, with and without obstruction |
| 533.0x | Peptic ulcer, acute with hemorrhage, with and without obstruction                                    |
| 533.1x | Peptic ulcer, acute with perforation, with and without obstruction                                   |
| 533.2x | Peptic ulcer, acute with hemorrhage and perforation, with and without obstruction                    |
| 533.4x | Peptic ulcer, chronic or unspecified with hemorrhage, with and without obstruction                   |
| 533.5x | Peptic ulcer, chronic or unspecified with perforation, with and without obstruction                  |
| 533.6x | Peptic ulcer, chronic or unspecified with hemorrhage and perforation, with and without obstruction   |
| 534.0x | Gastrojejunal ulcer, acute with hemorrhage, with and without obstruction                             |
| 534.1x | Gastrojejunal ulcer, acute with perforation, with and without obstruction                            |
| 534.2x | Gastrojejunal ulcer, acute with hemorrhage and perforation, with and without obstruction             |
| 534.4x | Gastrojejunal ulcer, chronic or unspecified with hemorrhage, with and without obstruction            |
| 534.5x | Gastrojejunal ulcer, chronic or unspecified with perforation, with and without obstruction           |

|                                                    |                                                                                                                                                         |
|----------------------------------------------------|---------------------------------------------------------------------------------------------------------------------------------------------------------|
| 534.6x                                             | Gastrojejunal ulcer, chronic or unspecified with hemorrhage and perforation, with and without obstruction                                               |
| Pneumonia                                          |                                                                                                                                                         |
| 480.x                                              | Viral pneumonia                                                                                                                                         |
| 481                                                | Pneumococcal pneumonia ( <i>Streptococcus pneumoniae</i> pneumonia)                                                                                     |
| 482.xx                                             | Other bacterial pneumonia                                                                                                                               |
| 483.x                                              | Pneumonia due to other specified organism                                                                                                               |
| 484.x                                              | Pneumonia in infectious disease classified elsewhere                                                                                                    |
| 485                                                | Bronchopneumonia, organism unspecified                                                                                                                  |
| 486                                                | Pneumonia, organism unspecified                                                                                                                         |
| 487.0                                              | Influenza with pneumonia                                                                                                                                |
| Opportunistic infections                           |                                                                                                                                                         |
| 112.4, 112.5,<br>112.81, 112.83,<br>112.84, 112.85 | Severe candidiasis: candidiasis of lung, disseminated candidiasis, candidal endocarditis, candidal meningitis, candidal esophagitis, candidal enteritis |
| 114.x                                              | Coccidioidomycosis                                                                                                                                      |
| 117.5, 321.0                                       | Cryptococcosis, cryptococcal meningitis                                                                                                                 |
| 007.4                                              | Cryptosporidiosis chronic intestinal (need 2 claims >1 month apart)                                                                                     |
| 078.5, 484.1                                       | Cytomegaloviral disease, pneumonia in cytomegalic inclusion disease                                                                                     |
| 054.3, 054.5,<br>054.71, 054.72,<br>054.74         | Severe herpes simplex: herpetic meningoencephalitis, herpetic septicemia, visceral herpes simplex, herpes simplex meningitis, herpes simplex myelitis   |

|                                                    |                                                                                                                                                                                                                                                                                                                      |
|----------------------------------------------------|----------------------------------------------------------------------------------------------------------------------------------------------------------------------------------------------------------------------------------------------------------------------------------------------------------------------|
| 053.0, 053.10,<br>053.14, 053.2x,<br>053.79, 053.8 | Disseminated herpes zoster: herpes zoster with meningitis, herpes zoster with unspecified nervous system complication, herpes zoster myelitis, herpes zoster with ophthalmic complications, herpes zoster with other specified complications (excluding otitis externa), herpes zoster with unspecified complication |
| 115.xx                                             | Histoplasmosis                                                                                                                                                                                                                                                                                                       |
| 007.2, 136.8                                       | Microsporidia or <i>Isospora</i> : coccidiosis (infection by <i>Isospora belli</i> and <i>Isospora hominis</i> ; isosporiasis), other specified infectious and parasitic diseases ( <i>Candida</i> infestation)                                                                                                      |
| 516.8                                              | Lymphoid interstitial pneumonia/hyperplasia complex                                                                                                                                                                                                                                                                  |
| 031.2                                              | Disseminated <i>Mycobacterium avium</i>                                                                                                                                                                                                                                                                              |
| 010.xx–018.xx                                      | Tuberculosis, pulmonary or extrapulmonary                                                                                                                                                                                                                                                                            |
| 031.0, 031.1,<br>031.8, 031.9                      | All other mycobacteria infections: pulmonary, cutaneous, other specified, unspecified                                                                                                                                                                                                                                |
| 136.3                                              | <i>Pneumocystis carinii/jiroveci</i>                                                                                                                                                                                                                                                                                 |
| 046.3                                              | Progressive multifocal encephalopathy                                                                                                                                                                                                                                                                                |
| 003.xx                                             | Recurrent salmonellosis (need 2 claims >2 months apart)                                                                                                                                                                                                                                                              |
| 130.0                                              | Toxoplasmosis of the brain                                                                                                                                                                                                                                                                                           |
| 484.6, 117.3,<br>117.7                             | Aspergillosis and zygomycosis (mucormycosis): pneumonia in aspergillosis, zygomycosis                                                                                                                                                                                                                                |
| 088.0                                              | Bartonellosis                                                                                                                                                                                                                                                                                                        |
| 114.x                                              | Coccidioidomycosis                                                                                                                                                                                                                                                                                                   |
| 176.x                                              | Kaposi's sarcoma                                                                                                                                                                                                                                                                                                     |
| Obesity                                            |                                                                                                                                                                                                                                                                                                                      |
| 278.0x                                             | Overweight and obesity                                                                                                                                                                                                                                                                                               |



## Hypertension

|        |                                               |
|--------|-----------------------------------------------|
| 362.11 | Hypertensive retinopathy                      |
| 401.x  | Essential hypertension                        |
| 402.xx | Hypertensive heart disease                    |
| 403.xx | Hypertensive chronic kidney disease           |
| 404.xx | Hypertensive heart and chronic kidney disease |
| 405.xx | Secondary hypertension                        |

## Diabetes/abnormal glucose

|        |                                             |
|--------|---------------------------------------------|
| 249.xx | Secondary diabetes mellitus                 |
| 250.xx | Diabetes mellitus                           |
| 357.2  | Polyneuropathy in diabetes                  |
| 362.0x | Diabetic retinopathy                        |
| 366.41 | Diabetic cataract                           |
| 790.2x | Abnormal glucose                            |
| 996.57 | Mechanical complication due to insulin pump |
| V45.85 | Insulin pump status                         |
| V53.91 | Fitting and adjustment of insulin pump      |
| V58.67 | Long-term (current) use of insulin          |

## Lipid disorders

|       |                                          |
|-------|------------------------------------------|
| 272.0 | Pure hypercholesterolemia                |
| 272.1 | Pure hyperglyceridemia                   |
| 272.2 | Mixed hyperlipidemia                     |
| 272.3 | Hyperchylomicronemia                     |
| 272.4 | Other and unspecified hyperlipidemia     |
| 272.8 | Other disorders of lipid metabolism      |
| 272.9 | Unspecified disorder of lipid metabolism |

Glaucoma

365.1x–365.9

Glaucoma

---

**Abbreviations:** CPT, Current Procedural Terminology; ICD-9-CM, *International Classification of Diseases, Ninth Revision, Clinical Modification*.

**Table S3** High OCS use: regression model results for overall annualized number of office visits

| Parameter                            | Estimate (SE) | P value <sup>a</sup> |
|--------------------------------------|---------------|----------------------|
| With vs without possible side effect | 3.5 (0.7)     | <0.001               |
| Age (years)                          |               |                      |
| 18–34 vs ≥65                         | 1.3 (1.2)     | 0.295                |
| 35–44 vs ≥65                         | 2.9 (0.9)     | 0.002                |
| 45–54 vs ≥65                         | 1.6 (0.8)     | 0.044                |
| 55–64 vs ≥65                         | 1.7 (0.7)     | 0.021                |
| Female vs male                       | 3.5 (0.5)     | <0.001               |
| Region                               |               |                      |
| Midwest vs West                      | –2.5 (0.8)    | 0.002                |
| Northeast vs West                    | 0.1 (1.0)     | 0.882                |
| South vs West                        | –0.8 (0.7)    | 0.305                |
| Charlson Comorbidity Index score     | 1.5 (0.1)     | <0.001               |
| COPD vs no COPD                      | 0.6 (0.5)     | 0.284                |

**Note:** <sup>a</sup>t test.

**Abbreviations:** COPD, chronic obstructive pulmonary disease; OCS, oral corticosteroid; SE, standard error.

**Table S4** High OCS use: negative binomial model results for overall annualized emergency department visits

| Parameter                            | Estimate (SE) | P value <sup>a</sup> |
|--------------------------------------|---------------|----------------------|
| With vs without possible side effect | 1.10 (0.18)   | 0.549                |
| Age (years)                          |               |                      |
| 18–34 vs ≥65                         | 2.96 (0.83)   | <0.001               |
| 35–44 vs ≥65                         | 3.05 (0.67)   | <0.001               |
| 45–54 vs ≥65                         | 2.60 (0.48)   | <0.001               |
| 55–64 vs ≥65                         | 2.13 (0.38)   | <0.001               |
| Female vs male                       | 1.43 (0.18)   | 0.004                |
| Region                               |               |                      |
| Midwest vs West                      | 1.32 (0.25)   | 0.133                |
| Northeast vs West                    | 1.15 (0.25)   | 0.504                |
| South vs West                        | 1.25 (0.21)   | 0.181                |
| Charlson Comorbidity Index score     | 1.07 (0.02)   | 0.001                |
| COPD vs no COPD                      | 0.78 (0.10)   | 0.040                |

**Note:** <sup>a</sup>Wald  $\chi^2$  test.

**Abbreviations:** COPD, chronic obstructive pulmonary disease; OCS, oral corticosteroid; SE, standard error.

**Table S5** High OCS use: negative binomial model results for overall annualized inpatient hospitalizations

| Parameter                            | Estimate (SE) | P value <sup>a</sup> |
|--------------------------------------|---------------|----------------------|
| With vs without possible side effect | 1.98 (0.21)   | <0.001               |
| Age (years)                          |               |                      |
| 18–34 vs ≥65                         | 2.66 (0.30)   | <0.001               |
| 35–44 vs ≥65                         | 1.75 (0.16)   | <0.001               |
| 45–54 vs ≥65                         | 1.49 (0.11)   | <0.001               |
| 55–64 vs ≥65                         | 1.33 (0.09)   | <0.001               |
| Female vs male                       | 1.14 (0.06)   | 0.012                |
| Region                               |               |                      |
| Midwest vs West                      | 1.30 (0.10)   | 0.001                |
| Northeast vs West                    | 1.07 (0.10)   | 0.453                |
| South vs West                        | 1.03 (0.08)   | 0.738                |
| Charlson Comorbidity Index score     | 1.17 (0.01)   | <0.001               |
| COPD vs no COPD                      | 2.46 (0.14)   | <0.001               |

**Note:** <sup>a</sup>Wald  $\chi^2$  test.

**Abbreviations:** COPD, chronic obstructive pulmonary disease; OCS, oral corticosteroid; SE, standard error.

**Table S6** High OCS use: regression model results for overall annualized number of asthma-related office visits

| Parameter                            | Estimate (SE) | P value <sup>a</sup> |
|--------------------------------------|---------------|----------------------|
| With vs without possible side effect | 0.3 (0.2)     | 0.205                |
| Age (years)                          |               |                      |
| 18–34 vs ≥65                         | 0.6 (0.4)     | 0.133                |
| 35–44 vs ≥65                         | 1.5 (0.3)     | <0.001               |
| 45–54 vs ≥65                         | 1.1 (0.3)     | <0.001               |
| 55–64 vs ≥65                         | 0.8 (0.2)     | <0.001               |
| Female vs male                       | 0.0 (0.2)     | 0.973                |
| Region                               |               |                      |
| Midwest vs West                      | –0.6 (0.3)    | 0.022                |
| Northeast vs West                    | 0.1 (0.3)     | 0.827                |
| South vs West                        | –0.1 (0.2)    | 0.714                |
| Charlson Comorbidity Index score     | –0.2 (0.0)    | <0.001               |
| COPD vs no COPD                      | 0.3 (0.2)     | 0.096                |

**Note:** <sup>a</sup>*t* test.

**Abbreviations:** COPD, chronic obstructive pulmonary disease; OCS, oral corticosteroid; SE, standard error.

**Table S7** High OCS use: negative binomial model results for asthma-related annualized emergency department visits

| Parameter                            | Estimate (SE) | P value <sup>a</sup> |
|--------------------------------------|---------------|----------------------|
| With vs without possible side effect | 1.38 (0.65)   | 0.451                |
| Age (years)                          |               |                      |
| 18–34 vs ≥65                         | 52.77 (47.67) | <0.001               |
| 35–44 vs ≥65                         | 8.12 (5.80)   | <0.001               |
| 45–54 vs ≥65                         | 4.02 (2.47)   | 0.007                |
| 55–64 vs ≥65                         | 1.08 (0.70)   | 0.882                |
| Female vs male                       | 1.02 (0.35)   | 0.943                |
| Region                               |               |                      |
| Midwest vs West                      | 13.10 (13.83) | <0.001               |
| Northeast vs West                    | 2.62 (3.50)   | 0.264                |
| South vs West                        | 5.90 (6.16)   | 0.018                |
| Charlson Comorbidity Index score     | 1.11 (0.07)   | 0.104                |
| COPD vs no COPD                      | 3.64 (1.37)   | <0.001               |

**Note:** <sup>a</sup>Wald  $\chi^2$  test.

**Abbreviations:** COPD, chronic obstructive pulmonary disease; OCS, oral corticosteroid; SE, standard error.

**Table S8** High OCS use: negative binomial model results for asthma-related annualized inpatient hospitalizations

| Parameter                            | Estimate (SE) | P value <sup>a</sup> |
|--------------------------------------|---------------|----------------------|
| With vs without possible side effect | 2.26 (0.50)   | <0.001               |
| Age (years)                          |               |                      |
| 18–34 vs ≥65                         | 7.47 (1.95)   | <0.001               |
| 35–44 vs ≥65                         | 4.25 (0.95)   | <0.001               |
| 45–54 vs ≥65                         | 3.24 (0.63)   | <0.001               |
| 55–64 vs ≥65                         | 1.96 (0.38)   | <0.001               |
| Female vs male                       | 1.47 (0.19)   | 0.002                |
| Region                               |               |                      |
| Midwest vs West                      | 1.51 (0.30)   | 0.031                |
| Northeast vs West                    | 1.51 (0.33)   | 0.057                |
| South vs West                        | 1.06 (0.20)   | 0.760                |
| Charlson Comorbidity Index score     | 1.01 (0.02)   | 0.615                |
| COPD vs no COPD                      | 5.27 (0.72)   | <0.001               |

**Note:** <sup>a</sup>Wald  $\chi^2$  test.

**Abbreviations:** COPD, chronic obstructive pulmonary disease; OCS, oral corticosteroid; SE, standard error.



**Table S9** High OCS use: regression model results for overall annualized<sup>a</sup> costs

| <b>Parameter</b>                     | <b>Estimate (SE)</b> | <b>P value<sup>b</sup></b> |
|--------------------------------------|----------------------|----------------------------|
| With vs without possible side effect | \$3,285 (\$1,264)    | 0.009                      |
| Age (years)                          |                      |                            |
| 18–34 vs ≥65                         | \$11,830 (\$2102)    | <0.001                     |
| 35–44 vs ≥65                         | \$9769 (\$1659)      | <0.001                     |
| 45–54 vs ≥65                         | \$10,471 (\$1375)    | <0.001                     |
| 55–64 vs ≥65                         | \$9615 (\$1308)      | <0.001                     |
| Female vs male                       | \$1020 (\$935)       | 0.275                      |
| Region                               |                      |                            |
| Midwest vs West                      | –\$1780 (\$1412)     | 0.208                      |
| Northeast vs West                    | –\$3076 (\$1676)     | 0.067                      |
| South vs West                        | –\$1878 (\$1292)     | 0.146                      |
| Charlson Comorbidity Index score     | \$4720 (\$176)       | <0.001                     |
| COPD vs no COPD                      | \$4107 (\$954)       | <0.001                     |

**Notes:** <sup>a</sup>Annualized costs using total costs from years 1 and 2. <sup>b</sup>*t* test.

**Abbreviations:** COPD, chronic obstructive pulmonary disease; OCS, oral corticosteroid; SE, standard error.

**Table S10** High OCS use: regression model results for total annualized<sup>a</sup> asthma-related costs

| Parameter                            | Estimate (SE)   | P value <sup>b</sup> |
|--------------------------------------|-----------------|----------------------|
| With vs without possible side effect | \$261 (\$298)   | 0.382                |
| Age (years)                          |                 |                      |
| 18–34 vs ≥65                         | \$146 (\$496)   | 0.769                |
| 35–44 vs ≥65                         | \$480 (\$391)   | 0.220                |
| 45–54 vs ≥65                         | \$302 (\$324)   | 0.352                |
| 55–64 vs ≥65                         | \$530 (\$308)   | 0.086                |
| Female vs male                       | –\$367 (\$220)  | 0.096                |
| Region                               |                 |                      |
| Midwest vs West                      | –\$191 (\$333)  | 0.567                |
| Northeast vs West                    | \$20 (\$395)    | 0.960                |
| South vs West                        | –\$210 (\$305)  | 0.491                |
| Charlson Comorbidity Index score     | –\$234 (\$42)   | <0.001               |
| COPD vs no COPD                      | \$1,175 (\$225) | <0.001               |

**Notes:** <sup>a</sup>Annualized costs using total costs from years 1 and 2. <sup>b</sup>*t* test.

**Abbreviations:** COPD, chronic obstructive pulmonary disease; OCS, oral corticosteroid; SE, standard error.
